# Supplementary material
Source: MDPI journal article supplement (https://www.mdpi.com/2227-9040/11/1/15)
Supplement: s1 [file s1]

Type of the Paper (Article)

# Application of screen printed diamond electrode, coupled with “point-of-care” platform, for nanomolar quantification of phytonutrient pterostilbene in dietary supplements. An experimental study supported by theory

Sladana Đurđić <sup>1</sup>, Filip Vlahović <sup>2</sup>, Milan Markičević <sup>3</sup>, Jelena Mutić <sup>1</sup>, Dragan Manojlović <sup>1,4</sup>, Vesna Stanković <sup>2</sup>, Ľubomír Švorc <sup>5</sup> and Dalibor Stanković <sup>1,6\*</sup>

<sup>1</sup> Department of Analytical Chemistry, University of Belgrade - Faculty of Chemistry, , Studentski trg 12-16, 11000 Belgrade, Serbia

<sup>2</sup> Scientific Institution, Institute of Chemistry, Technology and Metallurgy, National Institute University of Belgrade, 11000 Belgrade, Serbia

<sup>3</sup> Institute for Oncology and Radiology of Serbia (IORS), Department of Radiotherapy Physics, Pasterova 14, 11000 Belgrade, Serbia

<sup>4</sup> South Ural State University, Lenin Prospect 76, 454080, Chelyabinsk, Russia

<sup>5</sup> Institute of Analytical Chemistry, Faculty of Chemical and Food Technology, Slovak University of Technology in Bratislava, Radlinského 9, Bratislava SK-812 37, Slovak Republic

<sup>6</sup> Department of Radioisotopes, “VINČA” Institute of Nuclear Sciences-National Institute of the Republic of Serbia, University of Belgrade, 11000 Belgrade, Serbia

\* Correspondence: dalibors@chem.bg.ac.rs

## Supplementary material

## Figures

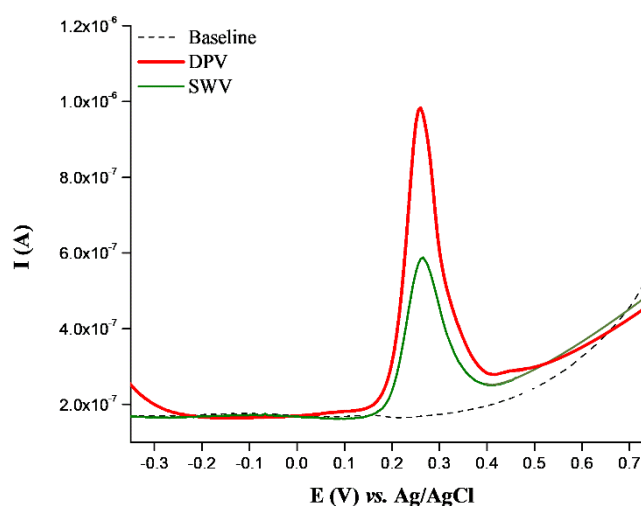

**Figure S1.** Electrochemical response of 6  $\mu\text{mol L}^{-1}$  PTS in BRBS (pH=9) at SPDE recorder by DPV (modulation amplitude 25 mV; modulation time 0.05 s; interval time 0.5 s) and SWV (modulation amplitude 20 mV; frequency 25 Hz).

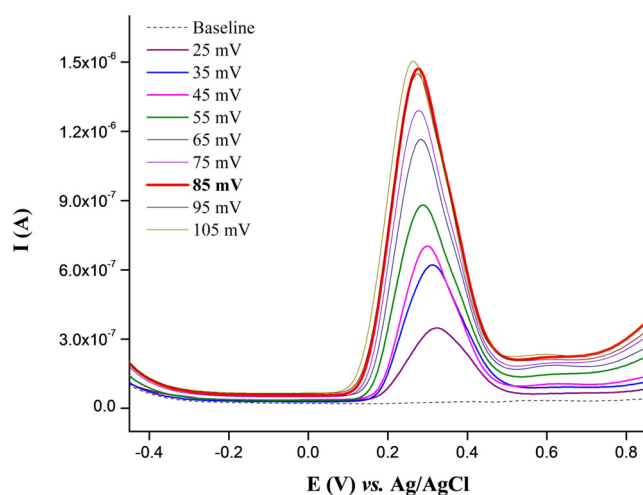

**Figure S2.** DP voltammograms for 0.65  $\mu\text{mol L}^{-1}$  of PTS in BRBS (pH=9) recorder at different modulation amplitudes (modulation time of 50 ms; interval time of 500 ms).

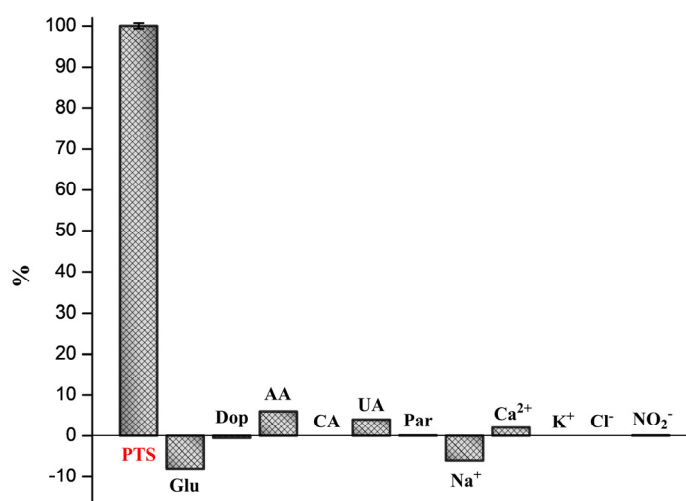

**Figure S3.** Effect of possible interfering compounds for the detection of PTS by SPDE. All experiments were done under previously optimized experimental conditions (the optimized DPV parameters: modulation amplitude of 85 mV; modulation time of 50 ms; interval time of 500 ms).

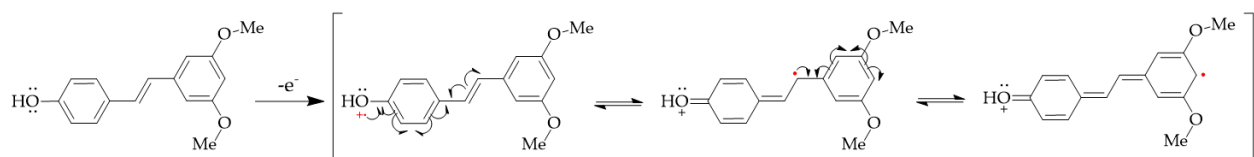

**Figure S4.** Possible resonance hybrid-structures, generated after the oxidation of phenol OH- group.

## Tables

**Table S1.** Mulliken charge analysis and calculated Fukui functions for PTS and corresponding oxidized adduct

| No. | A. | [PTS]  |        |        |              |              |              | [PTS] <sup>+</sup> |        |        |              |              |              | Spin-Density |
|-----|----|--------|--------|--------|--------------|--------------|--------------|--------------------|--------|--------|--------------|--------------|--------------|--------------|
|     |    | N      | N+1    | N-1    | Nu.          | El.          | Rad.         | N                  | N+1    | N-1    | Nu.          | El.          | Rad.         |              |
| 1   | O  | -0.332 | -0.348 | -0.318 | -0.02        | -0.01        | -0.01        | -0.318             | -0.330 | -0.299 | -0.01        | -0.02        | -0.02        | -0.006       |
| 2   | O  | -0.333 | -0.346 | -0.317 | -0.01        | -0.02        | -0.01        | -0.316             | -0.331 | -0.293 | -0.01        | -0.02        | -0.02        | 0.003        |
| 3   | O  | -0.476 | -0.508 | -0.408 | -0.03        | -0.07        | -0.05        | -0.385             | -0.453 | -0.316 | -0.07        | -0.07        | -0.07        | 0.075        |
| 4   | C  | 0.197  | 0.175  | 0.211  | -0.02        | -0.01        | -0.02        | 0.198              | 0.189  | 0.233  | -0.01        | -0.03        | -0.02        | 0.000        |
| 5   | C  | -0.416 | -0.492 | -0.377 | -0.08        | -0.04        | -0.06        | -0.384             | -0.425 | -0.339 | -0.04        | -0.05        | -0.04        | 0.058        |
| 6   | C  | -0.363 | -0.422 | -0.302 | -0.06        | -0.06        | -0.06        | -0.301             | -0.364 | -0.236 | -0.06        | -0.06        | -0.06        | 0.122        |
| 7   | C  | 0.378  | 0.374  | 0.373  | 0.00         | 0.01         | 0.00         | 0.371              | 0.377  | 0.371  | 0.01         | 0.00         | 0.00         | -0.047       |
| 8   | C  | 0.340  | 0.344  | 0.340  | 0.00         | 0.00         | 0.00         | 0.334              | 0.336  | 0.337  | 0.00         | 0.00         | 0.00         | -0.039       |
| 9   | C  | -0.176 | -0.293 | -0.068 | <b>-0.12</b> | <b>-0.11</b> | <b>-0.11</b> | -0.058             | -0.173 | 0.028  | <b>-0.12</b> | <b>-0.09</b> | <b>-0.10</b> | <b>0.218</b> |
| 10  | C  | 0.165  | 0.161  | 0.226  | 0.00         | -0.06        | -0.03        | 0.218              | 0.157  | 0.287  | -0.06        | -0.07        | -0.07        | 0.114        |
| 11  | C  | -0.364 | -0.456 | -0.275 | <b>-0.09</b> | <b>-0.09</b> | <b>-0.09</b> | -0.281             | -0.370 | -0.176 | <b>-0.09</b> | <b>-0.10</b> | <b>-0.10</b> | <b>0.190</b> |
| 12  | C  | -0.181 | -0.323 | -0.106 | <b>-0.14</b> | -0.08        | <b>-0.11</b> | -0.104             | -0.174 | -0.051 | -0.07        | -0.05        | -0.06        | 0.096        |
| 13  | C  | -0.236 | -0.326 | -0.194 | <b>-0.09</b> | -0.04        | -0.07        | -0.194             | -0.237 | -0.161 | -0.04        | -0.03        | -0.04        | 0.057        |
| 14  | C  | -0.199 | -0.238 | -0.161 | -0.04        | -0.04        | -0.04        | -0.159             | -0.198 | -0.128 | -0.04        | -0.03        | -0.04        | 0.046        |
| 15  | C  | -0.233 | -0.248 | -0.190 | -0.02        | -0.04        | -0.03        | -0.196             | -0.240 | -0.155 | -0.04        | -0.04        | -0.04        | -0.006       |
| 16  | C  | -0.252 | -0.276 | -0.210 | -0.02        | -0.04        | -0.03        | -0.209             | -0.253 | -0.171 | -0.04        | -0.04        | -0.04        | 0.008        |
| 17  | C  | 0.305  | 0.261  | 0.354  | -0.04        | -0.05        | -0.05        | 0.359              | 0.308  | 0.408  | -0.05        | -0.05        | -0.05        | <b>0.144</b> |
| 18  | C  | -0.202 | -0.197 | -0.208 | 0.01         | 0.01         | 0.01         | -0.206             | -0.201 | -0.213 | 0.01         | 0.01         | 0.01         | 0.000        |
| 19  | C  | -0.206 | -0.199 | -0.210 | 0.01         | 0.00         | 0.01         | -0.210             | -0.206 | -0.214 | 0.00         | 0.00         | 0.00         | 0.000        |

**Table S2.** HOMO LUMO energy of PTS and PTSH<sup>+</sup> and corresponding HOMO-LUMO gap

| Structure         | HOMO |          | LUMO |          | LUMO-HOMO |          |
|-------------------|------|----------|------|----------|-----------|----------|
|                   | eV   | Kcal/mol | eV   | Kcal/mol | eV        | Kcal/mol |
| PTS               | -5.4 | -125.2   | -1.5 | -33.5    | 4.0       | 91.7     |
| PTSH <sup>+</sup> | -5.8 | -134.6   | -1.8 | -41.0    | 4.1       | 93.7     |

All theoretical results presented in this work are obtained through Orca [S1] electronic structure program suite (Program Version 5.0.2), by using Density Functional Theory (DFT) [S2,S3] approach. All calculations have been carried out on B3LYP [S4,S5] level of theory, coupled with def2-TZVP orbital basis set with the dispersion correction on the D3BJ-level [S6]. To make calculations as realistic as possible, solvation effects of water have been included using the conductor-like polarizable continuum model (C-PCM) [S7]. Table S1 contain Mulliken charge analysis information [8,9], together with the condensed forms of the Fukui functions [S10-S12], for all investigated molecular species in this work. All molecules have been fully optimized in the framework of described computational conditions. Orbital analysis was systematically undertaken to view the localization of the

unpaired electrons (where present). Specific molecule of interest is emphasized in the caption of the Table, together with its fully optimized one-electron oxidized analogue (corresponding field below). N stands for the emphasized molecule, and N+1 and N-1 represent corresponding nonoptimized, anionic and cationic form of that specific molecule (example: Table S1. N: [PTS]<sup>0</sup> N+1: [PTS]<sup>-</sup> N-1: [PTS]<sup>+</sup>). Abbreviations *Nu.* *El.* and *Rad.* represent reactivity towards nucleophiles, electrophiles and radical species respectively. Hydrogen atoms are not shown (since they are not relevant for the study), and most important values for remaining heavy atoms are indicated by bold formatting for better understanding.

The condensed forms of the Fukui function for an atom j in a specific molecule, are calculated using the equations 1, 2 and 3, for a nucleophilic ( $f_j^+(r)$ ), electrophilic ( $f_j^-(r)$ ), and radical attack ( $f_j^0(r)$ ), respectively. In these equations  $q_j$  is the atomic charge, evaluated from the Mulliken charge analysis, at the j<sup>th</sup> atomic site in the neutral (N), anionic (N+1), or cationic (N-1) chemical species.

$$f_j^+(r) = q_{j(N)} - q_{j(N+1)}, \quad (1)$$

$$f_j^-(r) = q_{j(N-1)} - q_{j(N)}, \quad (2)$$

$$f_j^0(r) = \frac{1}{2} \{q_{j(N-1)} - q_{j(N+1)}\} \quad (3)$$

#### XYZ coordinates of PTS

|   |              |              |              |
|---|--------------|--------------|--------------|
| O | -4.274045000 | -2.234112000 | 0.002692000  |
| O | -3.695839000 | 2.494037000  | 0.034140000  |
| O | 6.775898000  | -0.516046000 | -0.033988000 |
| C | -1.227148000 | -0.255078000 | 0.016322000  |
| C | -1.736187000 | 1.058174000  | 0.024790000  |
| C | -2.113804000 | -1.329919000 | 0.009967000  |
| C | -3.493929000 | -1.110054000 | 0.010359000  |
| C | -3.106648000 | 1.257367000  | 0.025674000  |
| C | 0.205414000  | -0.545370000 | 0.012855000  |
| C | 2.633024000  | 0.071974000  | -0.003879000 |
| C | -4.003105000 | 0.179609000  | 0.018072000  |
| C | 1.201671000  | 0.355103000  | 0.002065000  |
| C | 3.168678000  | -1.225520000 | 0.014745000  |
| C | 3.537404000  | 1.143846000  | -0.030651000 |
| C | 4.535691000  | -1.439827000 | 0.005444000  |
| C | 4.909104000  | 0.942691000  | -0.040635000 |
| C | 5.412089000  | -0.354239000 | -0.023076000 |
| C | -5.692731000 | -2.066915000 | -0.000399000 |
| C | -2.846455000 | 3.642364000  | 0.042823000  |
| H | -1.062699000 | 1.899910000  | 0.031218000  |
| H | -1.742679000 | -2.346660000 | 0.003678000  |
| H | 0.447173000  | -1.602944000 | 0.017380000  |
| H | -5.063043000 | 0.383255000  | 0.018856000  |
| H | 0.957000000  | 1.412315000  | -0.005495000 |
| H | 2.511503000  | -2.084782000 | 0.037085000  |
| H | 3.151152000  | 2.155990000  | -0.044789000 |
| H | 4.933679000  | -2.447701000 | 0.020127000  |
| H | 5.593841000  | 1.780722000  | -0.062056000 |
| H | -6.110744000 | -3.070721000 | -0.007721000 |
| H | -6.022370000 | -1.527542000 | -0.891228000 |
| H | -6.027612000 | -1.538297000 | 0.894869000  |
| H | -2.217242000 | 3.659477000  | 0.935421000  |
| H | -3.511273000 | 4.502901000  | 0.050383000  |
| H | -2.218824000 | 3.673920000  | -0.850510000 |
| H | 6.992855000  | -1.459229000 | -0.025935000 |

|                                      |              |              |              |     |
|--------------------------------------|--------------|--------------|--------------|-----|
| XYZ coordinates of PTSH <sup>+</sup> |              |              |              | 113 |
| O                                    | -4.252627000 | -2.239854000 | -0.014772000 | 114 |
| O                                    | -3.706293000 | 2.490448000  | 0.083075000  | 115 |
| O                                    | 6.780631000  | -0.570496000 | -0.146637000 | 116 |
| C                                    | -1.221753000 | -0.240099000 | 0.012931000  | 117 |
| C                                    | -1.736347000 | 1.069882000  | 0.041753000  | 118 |
| C                                    | -2.098310000 | -1.322047000 | -0.002169000 | 119 |
| C                                    | -3.480196000 | -1.111889000 | 0.005101000  | 120 |
| C                                    | -3.108204000 | 1.259648000  | 0.051446000  | 121 |
| C                                    | 0.212216000  | -0.522210000 | -0.001568000 | 122 |
| C                                    | 2.634054000  | 0.090061000  | -0.061061000 | 123 |
| C                                    | -3.995984000 | 0.174733000  | 0.031613000  | 124 |
| C                                    | 1.202451000  | 0.381767000  | -0.048860000 | 125 |
| C                                    | 3.155920000  | -1.210276000 | 0.023951000  | 126 |
| C                                    | 3.535345000  | 1.160231000  | -0.159024000 | 127 |
| C                                    | 4.522576000  | -1.436243000 | 0.013437000  | 128 |
| C                                    | 4.908549000  | 0.956409000  | -0.179648000 | 129 |
| C                                    | 5.353646000  | -0.341714000 | -0.087015000 | 130 |
| C                                    | -5.672810000 | -2.081604000 | -0.016350000 | 131 |
| C                                    | -2.865534000 | 3.645460000  | 0.103558000  | 132 |
| H                                    | -1.067218000 | 1.914899000  | 0.060408000  | 133 |
| H                                    | -1.718678000 | -2.335331000 | -0.022646000 | 134 |
| H                                    | 0.458495000  | -1.578089000 | 0.023657000  | 135 |
| H                                    | -5.057326000 | 0.371090000  | 0.039673000  | 136 |
| H                                    | 0.959897000  | 1.437948000  | -0.087160000 | 137 |
| H                                    | 2.496518000  | -2.062520000 | 0.106677000  | 138 |
| H                                    | 3.152988000  | 2.170569000  | -0.224180000 | 139 |
| H                                    | 4.928695000  | -2.436933000 | 0.085242000  | 140 |
| H                                    | 5.603870000  | 1.781000000  | -0.260707000 | 141 |
| H                                    | -6.084072000 | -3.087909000 | -0.037680000 | 142 |
| H                                    | -6.004928000 | -1.532100000 | -0.900007000 | 143 |
| H                                    | -6.011070000 | -1.567194000 | 0.885806000  | 144 |
| H                                    | -2.231647000 | 3.654248000  | 0.992940000  | 145 |
| H                                    | -3.537180000 | 4.500291000  | 0.127134000  | 146 |
| H                                    | -2.243310000 | 3.694194000  | -0.792685000 | 147 |
| H                                    | 7.043201000  | -1.485801000 | 0.083653000  | 148 |
| H                                    | 7.309203000  | 0.061363000  | 0.384721000  | 149 |

**Author Contributions:** conceptualization, investigation, methodology, supervision, writing-original draft preparation, visualization, **S.D.**; investigation, writing-original draft preparation, visualization, **F.V.**; investigation, formal analysis, **M.M.**; validation, **J.M.**; formal analysis, **D.M.**; investigation, validation, **V.S.**; writing-review and editing, visualization, **L.Š.**; investigation, methodology writing-review and editing, visualization, supervision, project administration, funding acquisition, **D.S.** All authors have read and agreed to the published version of the manuscript.

**Funding:** This work was supported by the Ministry of Education, Science and Technological Development of Republic of Serbia (contract number: 451-03-68/2020-14/200168 and Grant no. 200026 (University of Belgrade, Institute of Chemistry, Technology and Metallurgy-ICH<sub>TM</sub>, RS-200026) and Eureka project E! 13303 MED-BIO-TEST (supported by the Ministry of Education, Science and Technological Development of Republic of Serbia (contract number 451-03-00053/2020-09/2/2). Moreover, this study has been supported by the Grant Agency of the Slovak Republic (VEGA No. 1/0159/20) and the bilateral Slovak - Serbian cooperation within the Slovak Research and Development Agency (SK-SRB-21-0019).

**Data Availability Statement:** The study did not report any data.

**Conflicts of Interest:** The authors declare no conflict of interest.

## References

- S1. Neese, F. The ORCA program system, WIREs Computational Molecular Science - Wiley Online Library, (n.d.), **2012**. <https://wires.onlinelibrary.wiley.com/doi/full/10.1002/wcms.81>. 40
- S2. Parr, R.G., Yang, W. **1989**. Density-Functional Theory of Atoms and Molecules, Oxford University Press, Oxford. 170
- S3. Stanton, J.F. A Chemist's Guide to Density Functional Theory By Wolfram Koch (German Chemical Society, Frankfurt am Main) and Max C. Holthausen (Humbolt University Berlin). *J. Am. Chem. Soc.* **2001**, 123, 2701–2701. <https://doi.org/10.1021/ja004799q>. 171

- 
- S4. C. Lee, W. Yang, R.G. Parr, Development of the Colle-Salvetti correlation-energy formula into a functional of the electron density. *Phys. Rev. B*. **1988**, 37, 785–789, doi:10.1103/PhysRevB.37.785. 173  
174
- S5. Becke, D. A. A new mixing of Hartree–Fock and local density-functional theories. *J. Chem. Phys.* **1993**, 98, 2, doi:10.1063/1.464304. 175
- S6. Kruse, H.; Grimme, S. A geometrical correction for the inter- and intra-molecular basis set superposition error in Hartree-Fock and density functional theory calculations for large systems: *J. Chem. Phys.* **2012**, 136, 15, doi:10.1063/1.3700154. 176  
177
- S7. Barone, V.; Cossi, M. Quantum Calculation of Molecular Energies and Energy Gradients in Solution by a Conductor Solvent Model. *J. Phys. Chem. A* **1998**, 102, 1995–2001, doi:10.1021/jp9716997. 178  
179
- S8. Mulliken, R.S. Electronic Population Analysis on LCAO–MO Molecular Wave Functions. IV. Bonding and Antibonding in LCAO and Valence-Bond Theories. *J Chem Phys* **1955**, 23, 2343, doi: 10.1063/1.1741877. 180  
181
- S9. Mulliken, R.S. Electronic Population Analysis on LCAO–MO Molecular Wave Functions. II. Overlap Populations, Bond Orders, and Covalent Bond Energies. *J Chem Phys* **1955**, 23, 1841, doi: 10.1063/1.1740589. 182  
183
- S10. Parr, R.G., Yang, W. **1989**. Density-Functional Theory of Atoms and Molecules, Oxford University Press, Oxford. 184
- S11. Yang, W. T., Parr, R. G., Pucci, R. Electron density, Kohn–Sham frontier orbitals, and Fukui functions. *J Chem Phys* **1984**, 81, 2862, doi: 10.1063/1.447964. 185  
186
- S12. Ayers, P. W., Levy, M. Perspective on “Density functional approach to the frontier-electron theory of chemical reactivity. *Theor. Chem. Acc.* **2000**, 103, 353–360, doi: 10.1007/s002149900093. 187  
188  
189
